# Supplementary material
Source: PubMed Central journal article supplement (PMC1569180)
Supplement: pnas_0603042103_1.pdf [file pnas_0603042103_1.pdf]

■ **Cassette splicing**

□ **Alternative 3' and 5' splicing**

**Proportion of rodent exons  
that are alternatively spliced**

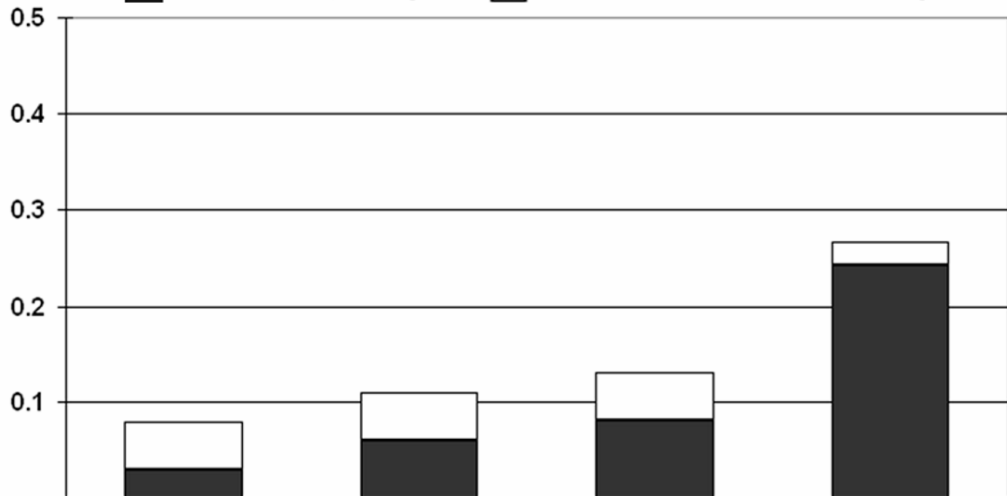

**No. of  
total  
exons:**

52787

3342

13870

1249

Rodent

+

+

+

+

Primate

+

-

Dog

+

-

Chicken

+

-

-

Fish

+

-

-

-
