# Supplementary material
Source: PubMed Central journal article supplement (PMC1569180)

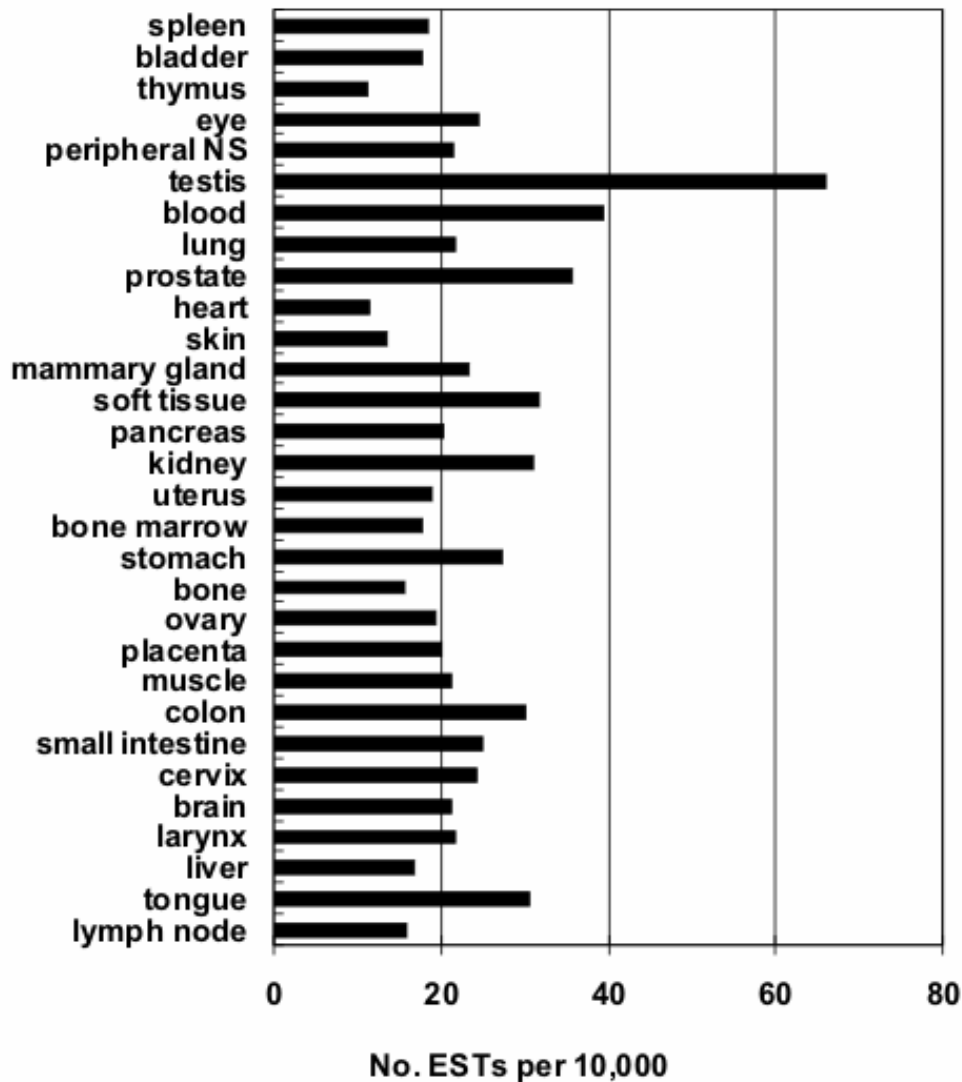

Supplement: pnas_0603042103_10.pdf [file pnas_0603042103_10.pdf]

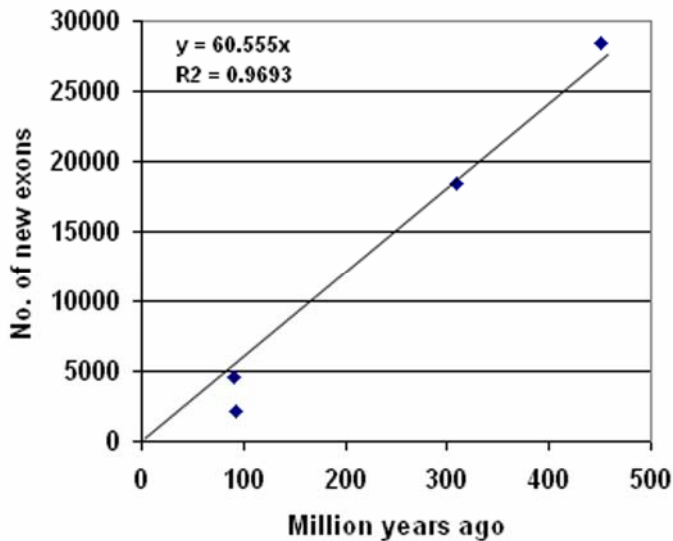

Supplement: pnas_0603042103_11.pdf [file pnas_0603042103_11.pdf]

**A**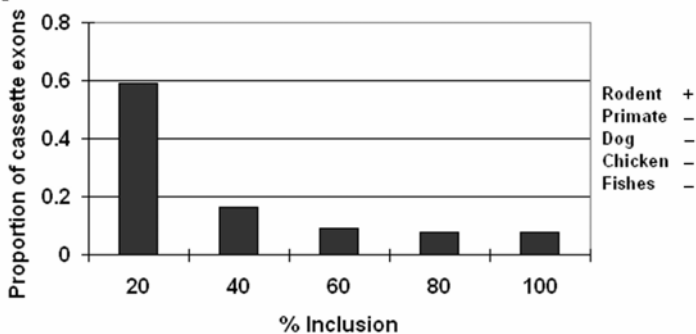**B**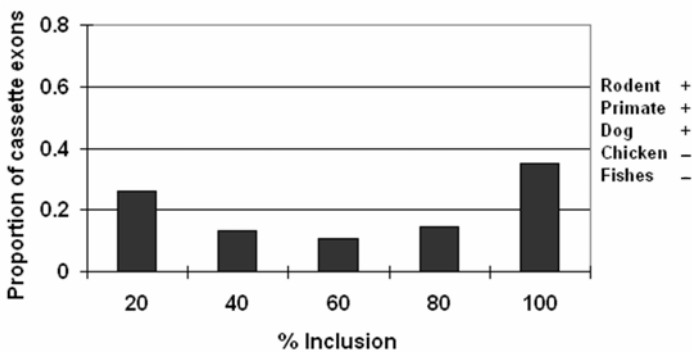**C**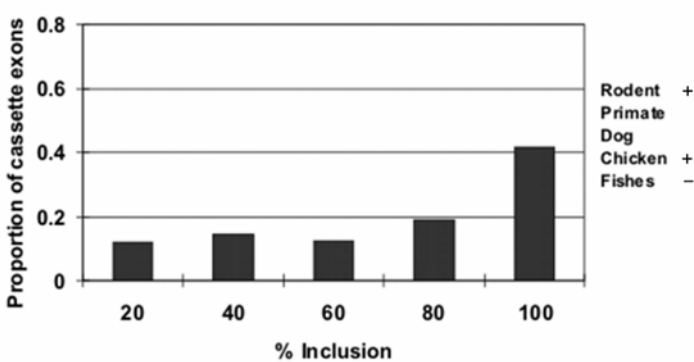**D**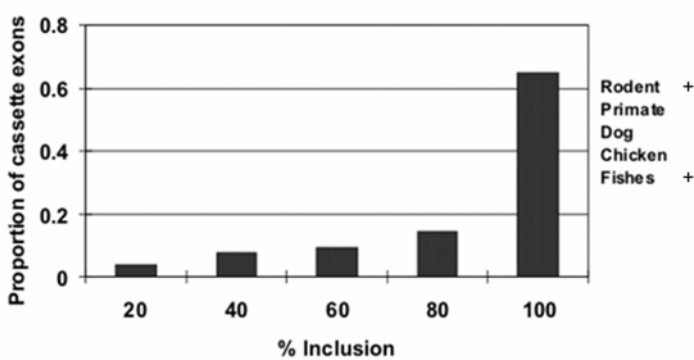

Supplement: pnas_0603042103_2.pdf [file pnas_0603042103_2.pdf]

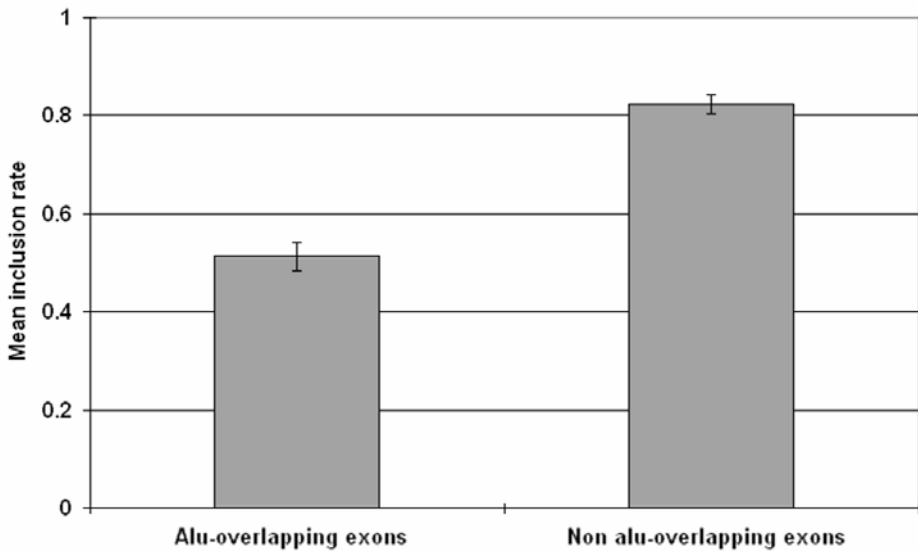

Supplement: pnas_0603042103_3.pdf [file pnas_0603042103_3.pdf]

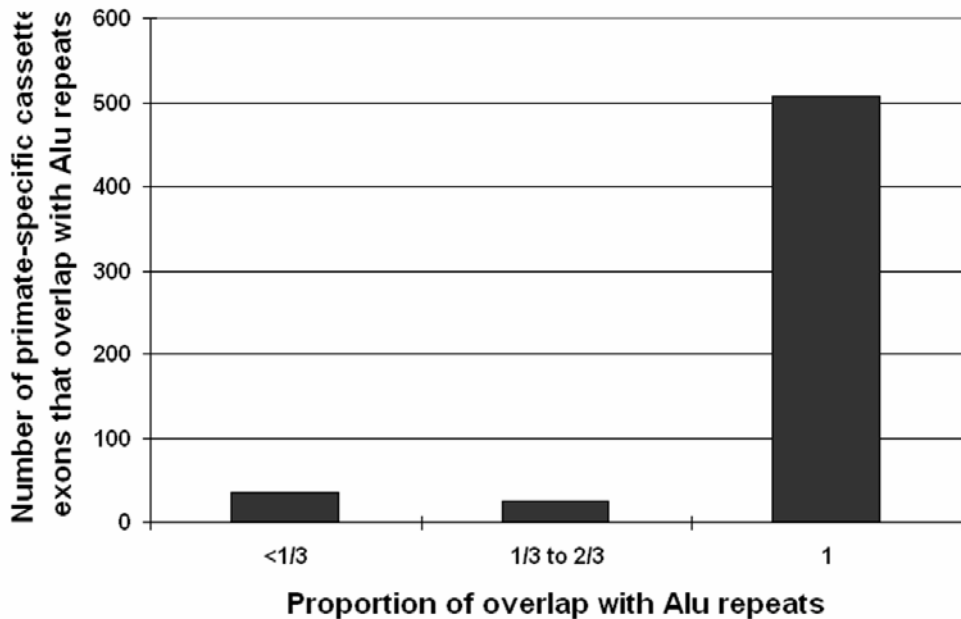

Supplement: pnas_0603042103_4.pdf [file pnas_0603042103_4.pdf]

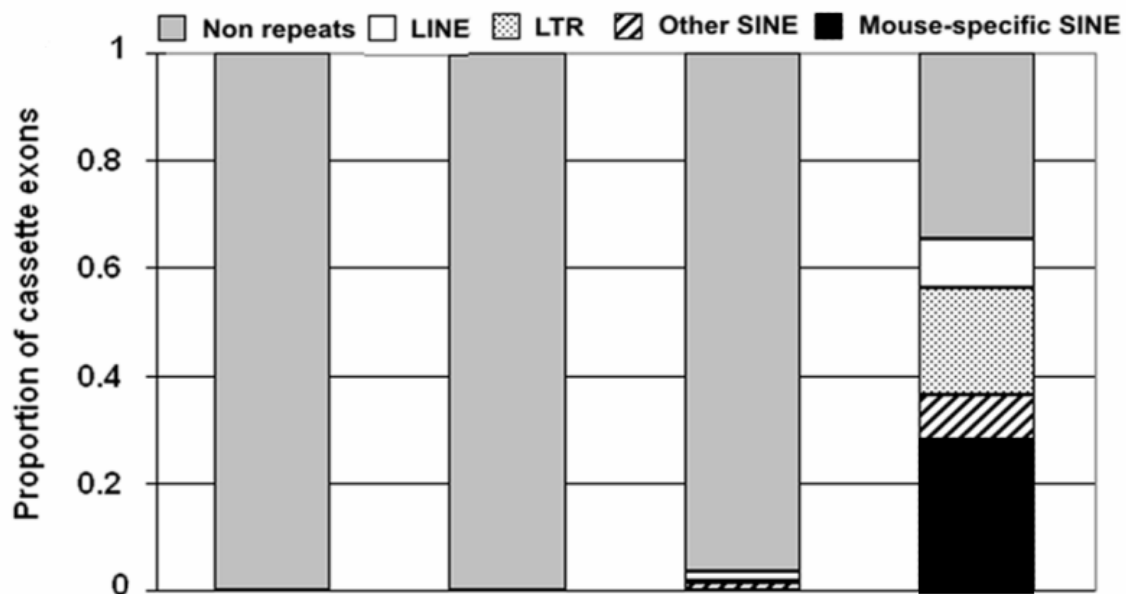

Number of  
cassette exons:

1518

199

1105

304

Conserved in:

Rodent

+

+

+

+

Primate

+

-

Dog

+

-

Chicken

+

-

-

Fish

+

-

-

-

Supplement: pnas_0603042103_5.pdf [file pnas_0603042103_5.pdf]

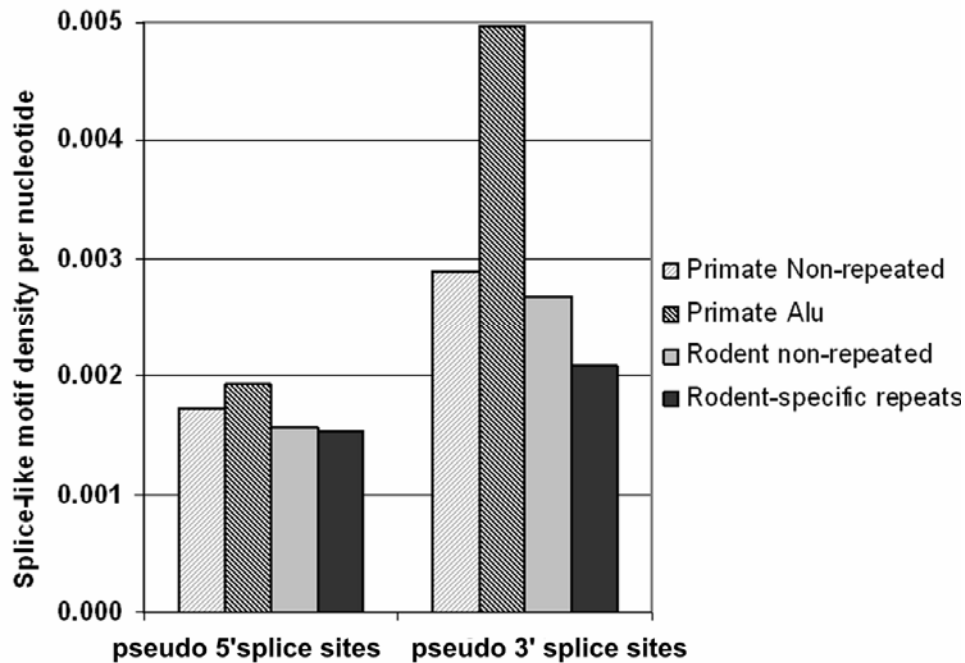

Supplement: pnas_0603042103_6.pdf [file pnas_0603042103_6.pdf]

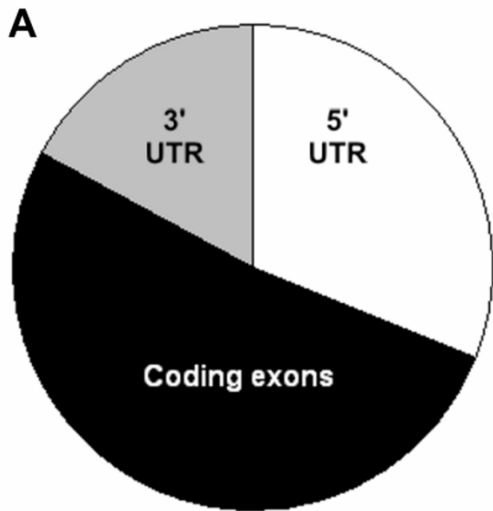

Overlap with repeats

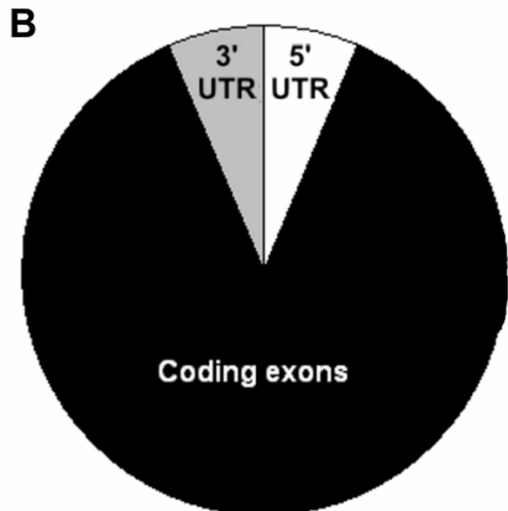

No overlap with repeats

Supplement: pnas_0603042103_7.pdf [file pnas_0603042103_7.pdf]

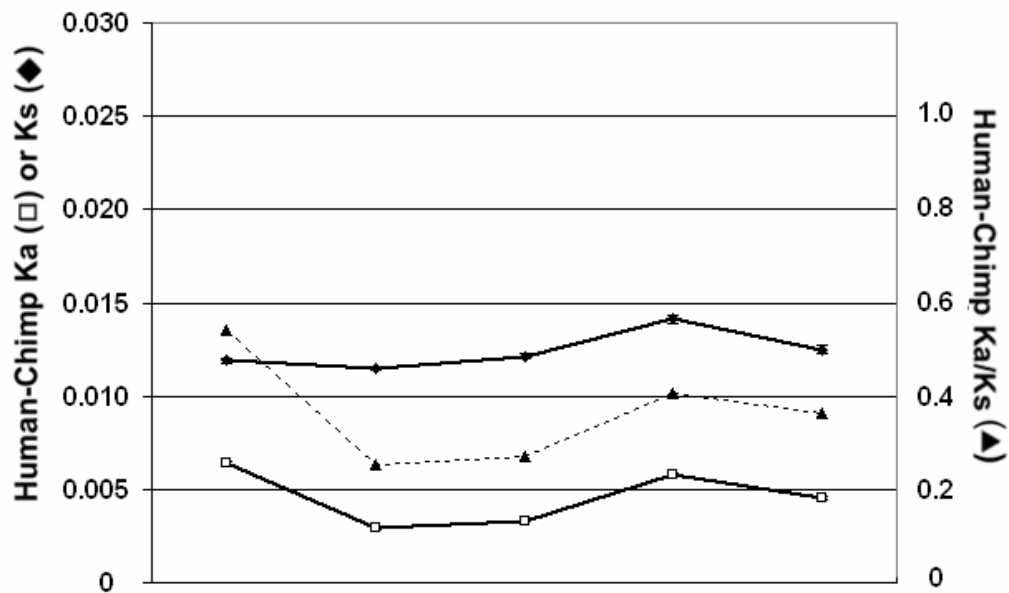

Conserved in:

|         |   |   |   |   |   |
|---------|---|---|---|---|---|
| Primate | + | + | + | + | + |
| Dog     |   |   |   | + | - |
| Rodent  |   |   | + | - | - |
| Chicken |   | + | - | - | - |
| Fish    | + | - | - | - | - |

Supplement: pnas_0603042103_8.pdf [file pnas_0603042103_8.pdf]

■ Recent exons    □ Ancient exons

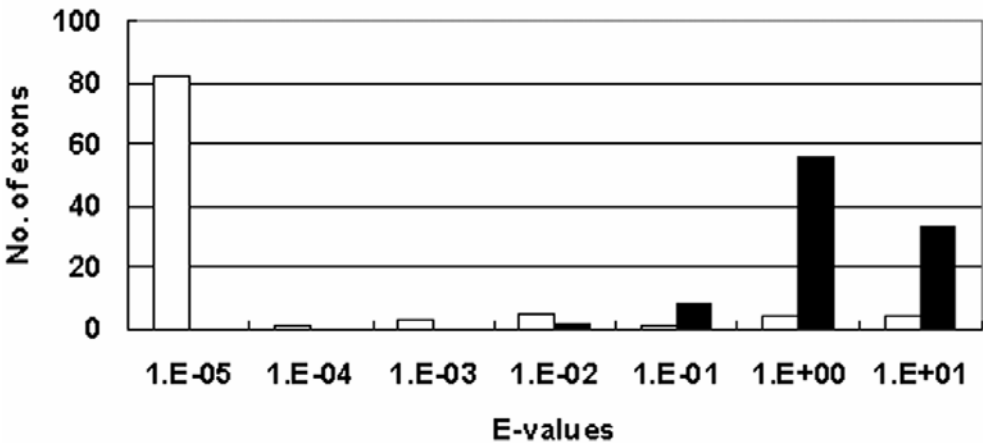

Supplement: pnas_0603042103_9.pdf [file pnas_0603042103_9.pdf]
